# Supplementary material for: RGS9‐2 rescues dopamine D2 receptor levels and signaling in DYT1 dystonia mouse models
Source: PubMed Central journal article supplement (PMC6328939; doi:10.15252/emmm.201809283), 2018-12-14
Supplement: EMMM-11-e9283-s001.pdf [file EMMM-11-e9283-s001.pdf]

## **Appendix**

### **Table of contents:**

**Table S1. Primary antibodies used for immunoblotting.**

**Table S2. Primary antibodies used for confocal imaging.**

**Appendix Table S1. Primary antibodies used for immunoblotting.**

| Antibody                       | Species    | Dilution | Supplier/code         | References                                                                                                                                                           |
|--------------------------------|------------|----------|-----------------------|----------------------------------------------------------------------------------------------------------------------------------------------------------------------|
| Anti-p62                       | Guinea Pig | 1:1000   | Progen (GP62-C)       | <a href="https://www.labome.com/product/Progen/gp62-c.html">https://www.labome.com/product/Progen/gp62-c.html</a><br>Waguri and Komatsu <i>Methods Enzymol.</i> 2009 |
| Anti-LC3                       | Mouse      | 1:250    | NanoTools (0231-100)  | Lin et al., <i>Cell Death Disease</i> 2014                                                                                                                           |
| Anti-RGS9                      | Goat       | 1:1000   | Santa Cruz (sc-8142)  | Mancuso et al., <i>J Neurochem</i> 2010<br>Napolitano et al., <i>Neurobiol. Dis.</i> 2010                                                                            |
| Anti-D2R                       | Rabbit     | 1:1000   | Millipore (AB5084P)   | Stojanovic et al., <i>Amino Acids</i> 2017                                                                                                                           |
| Anti-TorsinA                   | Rabbit     | 1:800    | Abcam (AB34540)       | Puglisi et al., <i>PlosOne</i> 2013                                                                                                                                  |
| Anti-RGS7                      | Goat       | 1:200    | Santa Cruz (sc-8139)  | Lopez-Fando et al., <i>Neuropsychopharmacol</i> 2005<br>Terzi et al., <i>Neuropsychopharmacol</i> 2012                                                               |
| Anti-Gβ5                       | Rabbit     | 1:1000   | Millipore (071208)    | Terzi et al., <i>Neuropsychopharmacol</i> 2012                                                                                                                       |
| Anti-R7BP                      | Goat       | 1:500    | Santa Cruz (sc-50170) | Terzi et al., <i>Neuropsychopharmacol</i> 2012                                                                                                                       |
| Anti-Rab4                      | Rabbit     | 1:1000   | Abcam (ab13252)       | Peng et al., <i>JBC</i> 2012                                                                                                                                         |
| Anti-spinophilin / neurabin-II | Rabbit     | 1:3000   | Sigma Aldrich (5162)  | Feng et al., <i>Proc Natl Acad Sci U S A.</i> 2000                                                                                                                   |
| Anti-LAMP2                     | Rat        | 1:200    | Genetex (GTX13524)    | Rothaug et al., <i>Acta Neuropathol Comm</i> 2015                                                                                                                    |
| Anti-β arrestin-2              | Mouse      | 1:500    | Santa Cruz (sc-13140) | Beaulieu et al., <i>Cell</i> 2005<br>Lee et al., <i>J Neurosci</i> 2011                                                                                              |
| Anti-GFP                       | Rabbit     | 1:200    | Santa Cruz (sc-8334)  | Kretz et al., <i>Molecular Therapy</i> 2003                                                                                                                          |

**Appendix Table S2. Primary antibodies used for confocal imaging.**

| Antibody  | Species    | Dilution | Supplier/code            | References                                                                               |
|-----------|------------|----------|--------------------------|------------------------------------------------------------------------------------------|
| Anti-RGS9 | Goat       | 1:1000   | Santa Cruz (sc-8142)     | Mancuso et al., <i>J Neurochem</i> 2010                                                  |
| Anti-ChAT | Goat       | 1:500    | Novus Biol. (NBP1-30052) | Ponterio et al., <i>Neuropharmacol</i> 2013                                              |
| Anti-p62  | Guinea Pig | 1:300    | Progen (GP62-C)          | Sarkar et al., <i>Autophagy</i> 2014                                                     |
| Anti-D2R  | Rabbit     | 1:500    | Millipore (AB5084P)      | Song et al., <i>Front Behav Neurosci</i> 2014<br>Rajput et al., <i>Neurosci Res</i> 2009 |
| Anti-PDI  | Mouse      | 1:500    | StressGene (SPA891)      | O'Farrel et al., <i>Neurosci</i> 2009                                                    |
