# Supplementary material for: RGS9‐2 rescues dopamine D2 receptor levels and signaling in DYT1 dystonia mouse models
Source: PubMed Central journal article supplement (PMC6328939; doi:10.15252/emmm.201809283), 2018-12-14

Figure 1A1 -torsinA

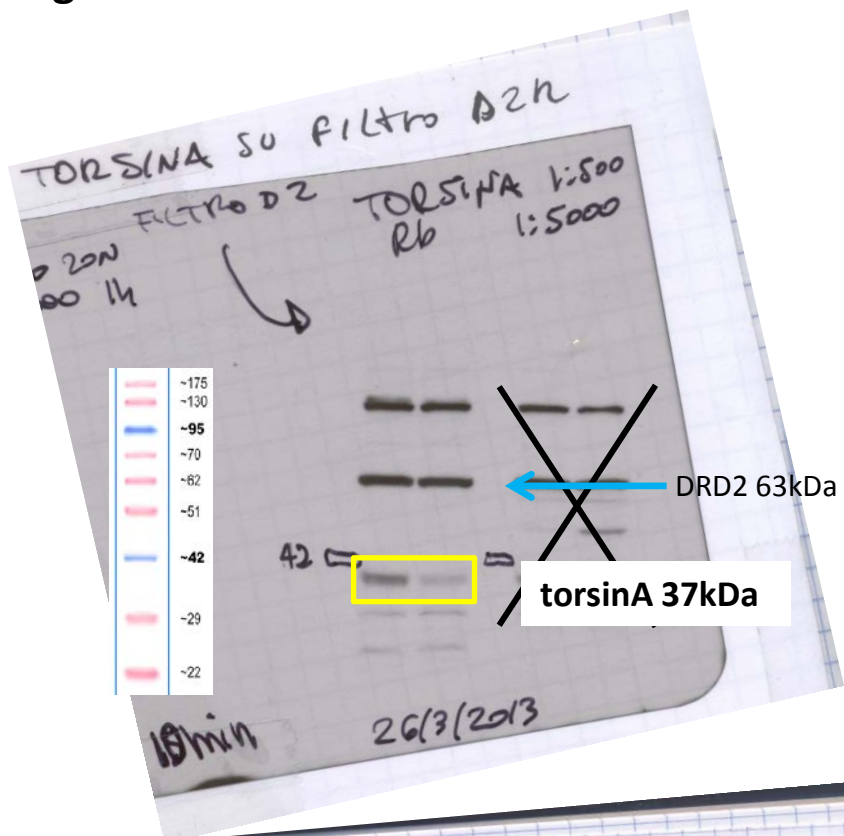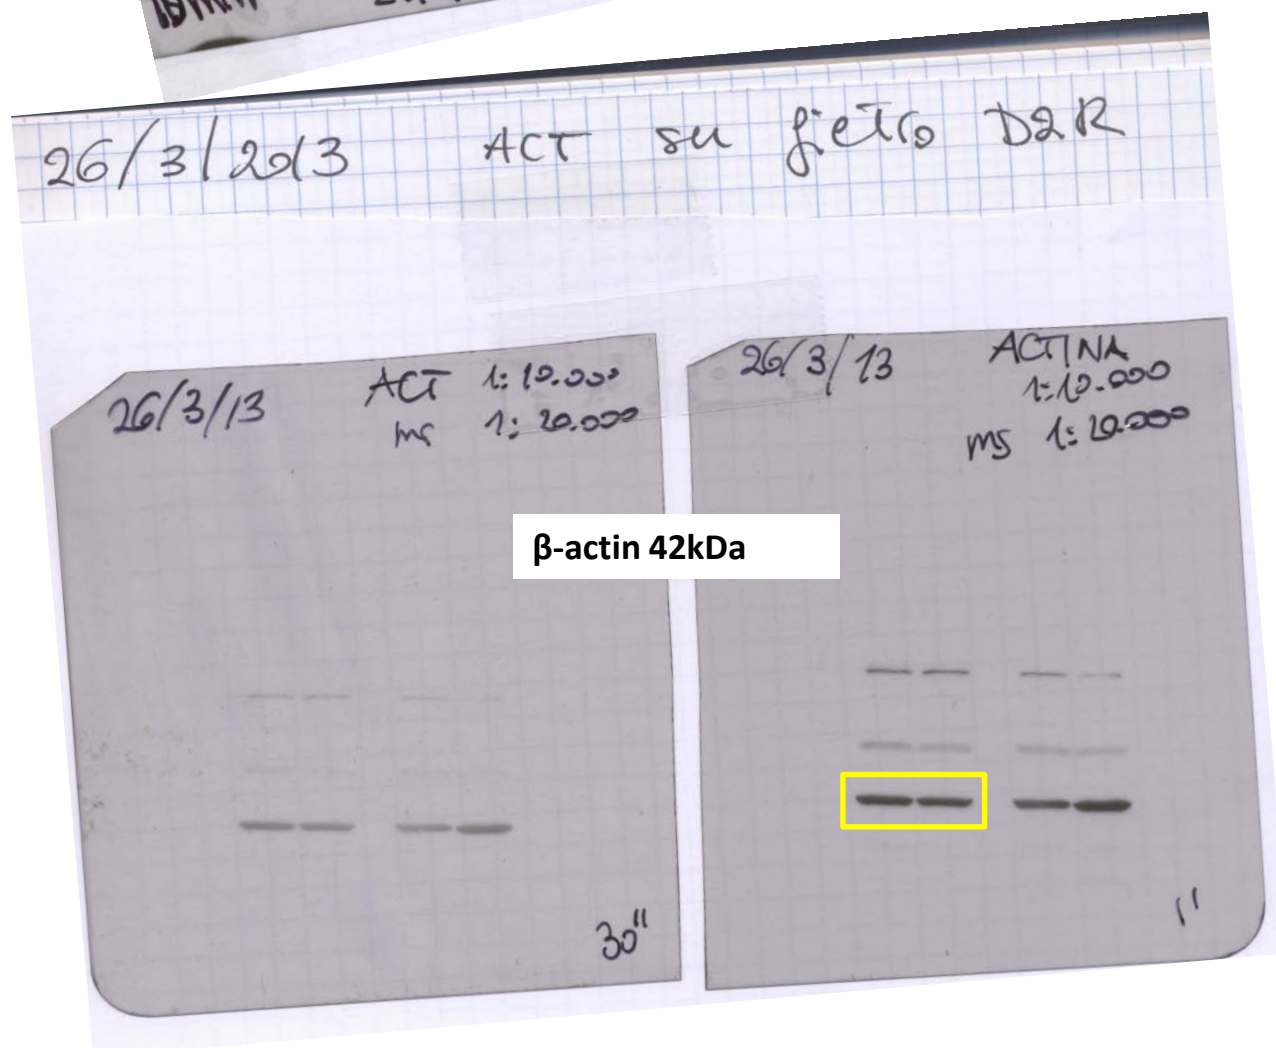

Figure 1A1 – RGS7

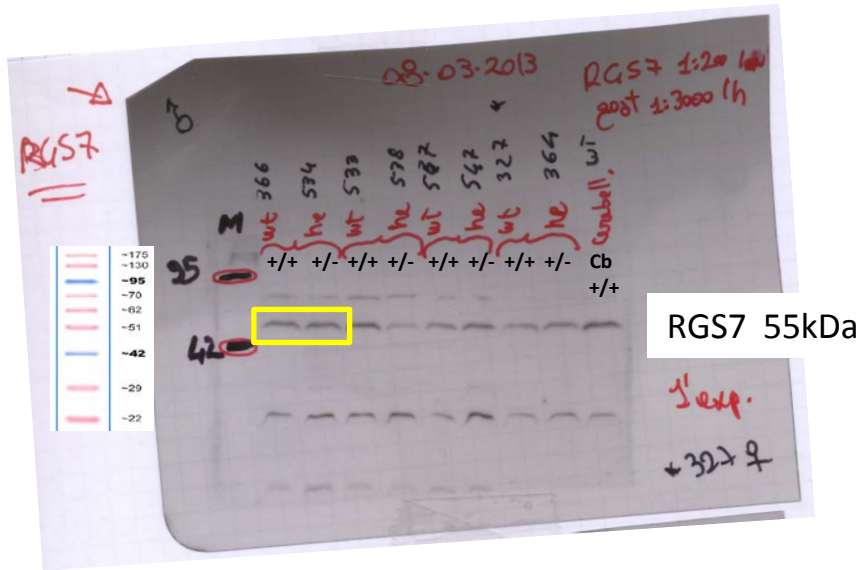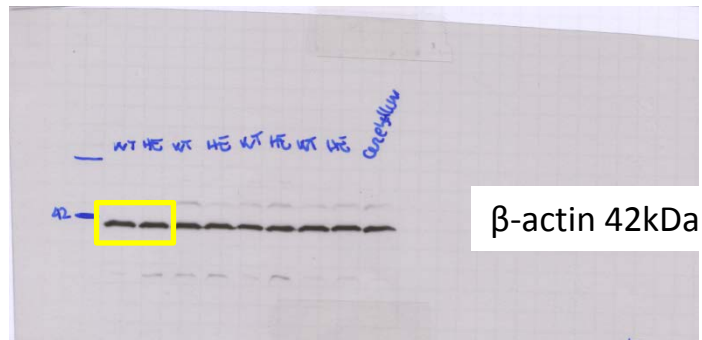

# Figure 1A1 – RGS9-2, DRD2

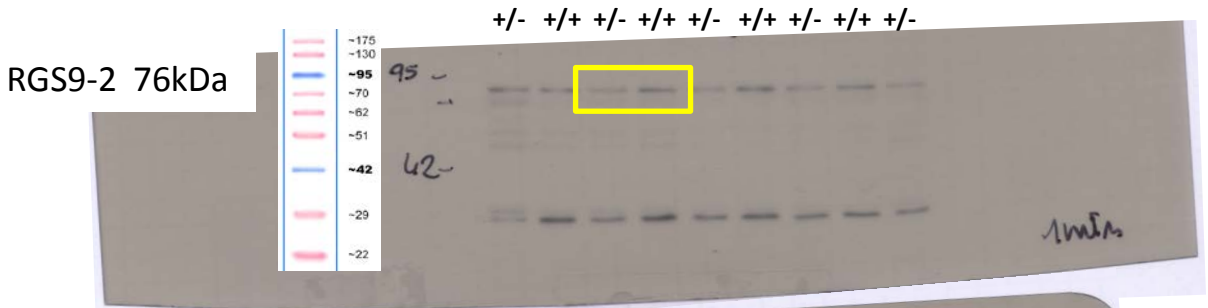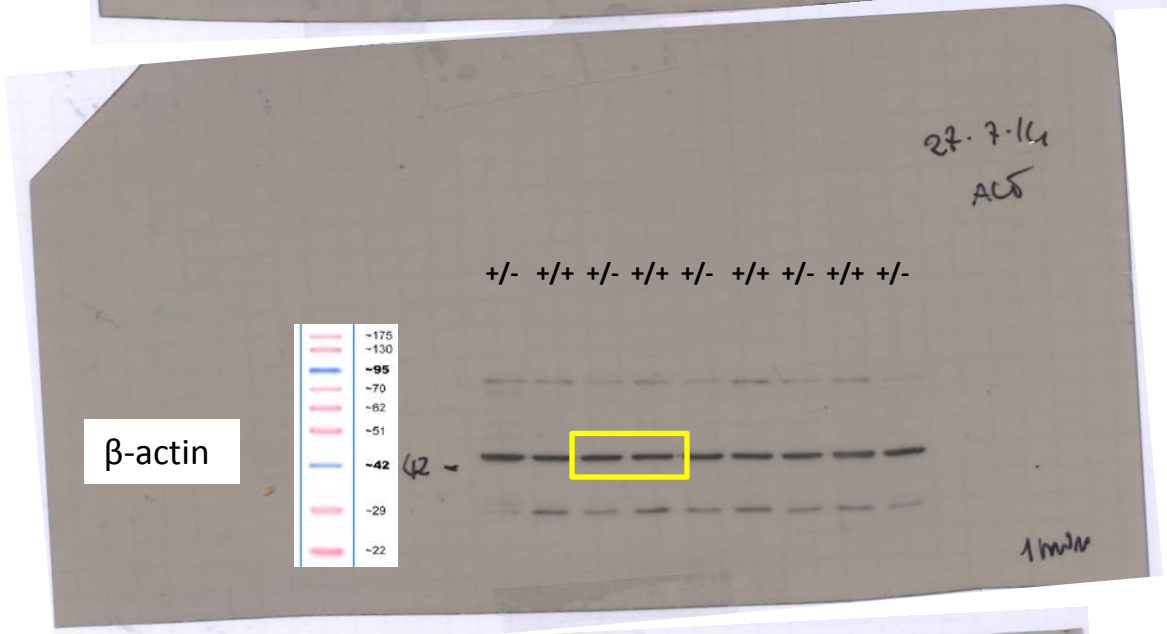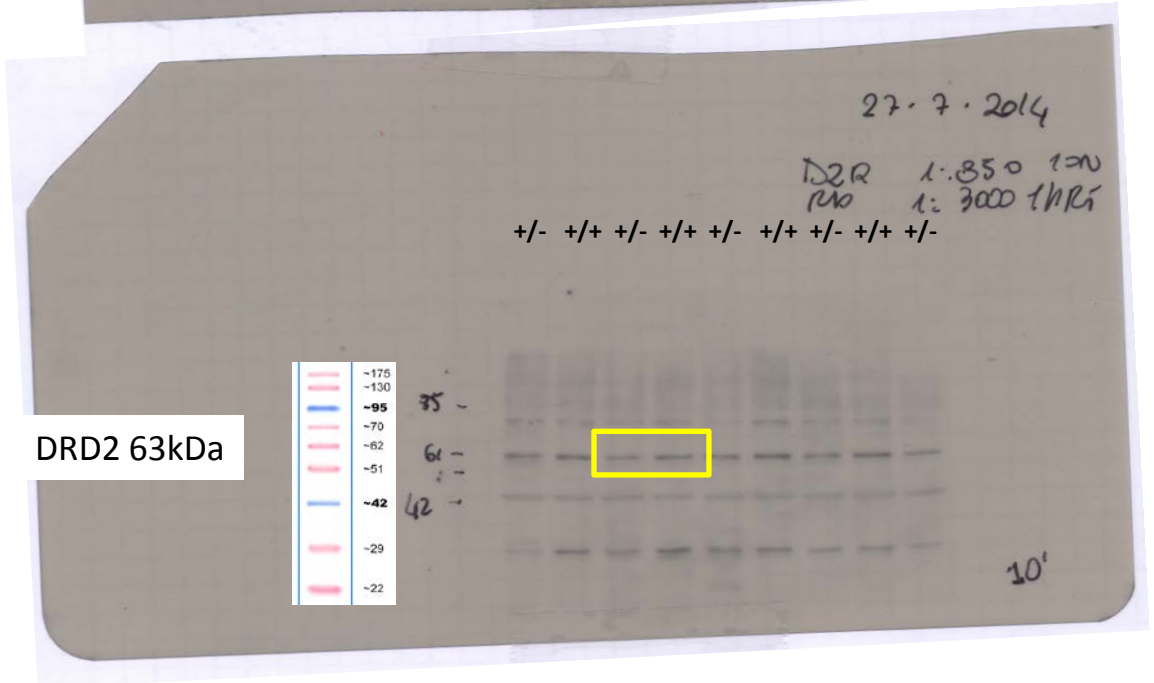

**Figure 1A2**

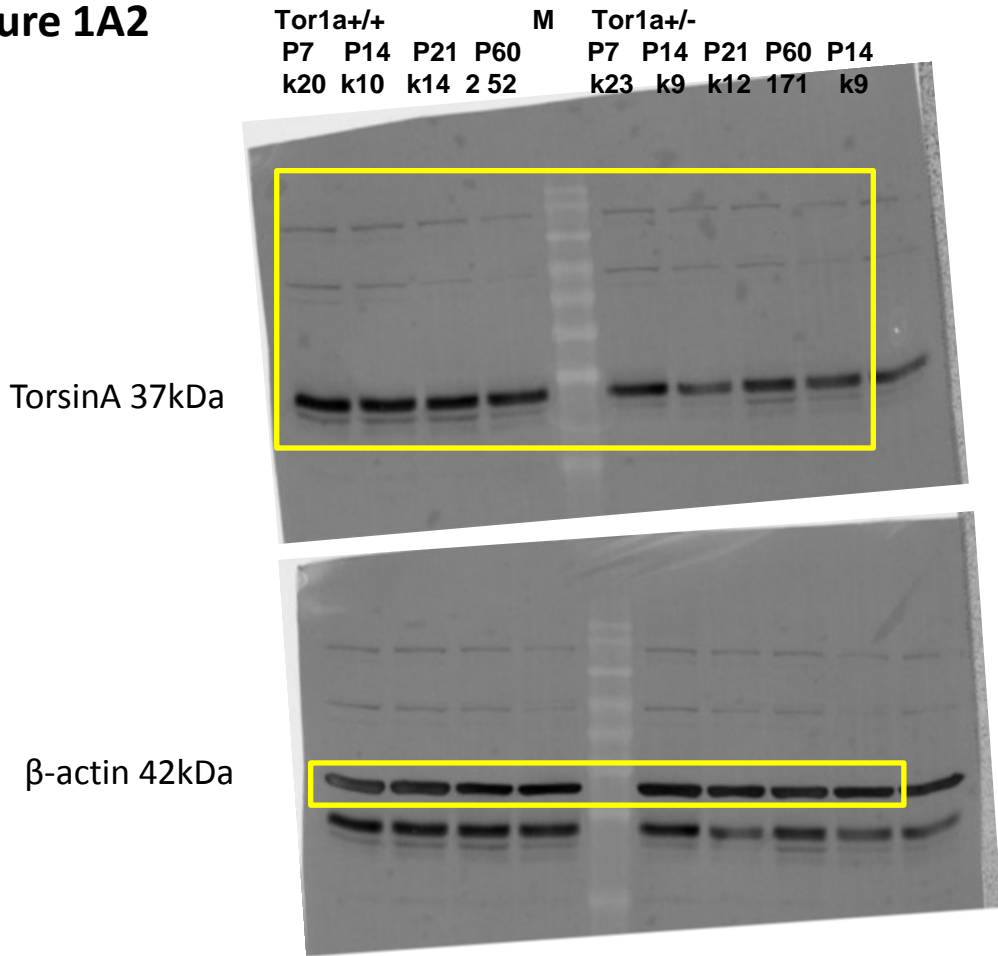

**Figure 1A3**

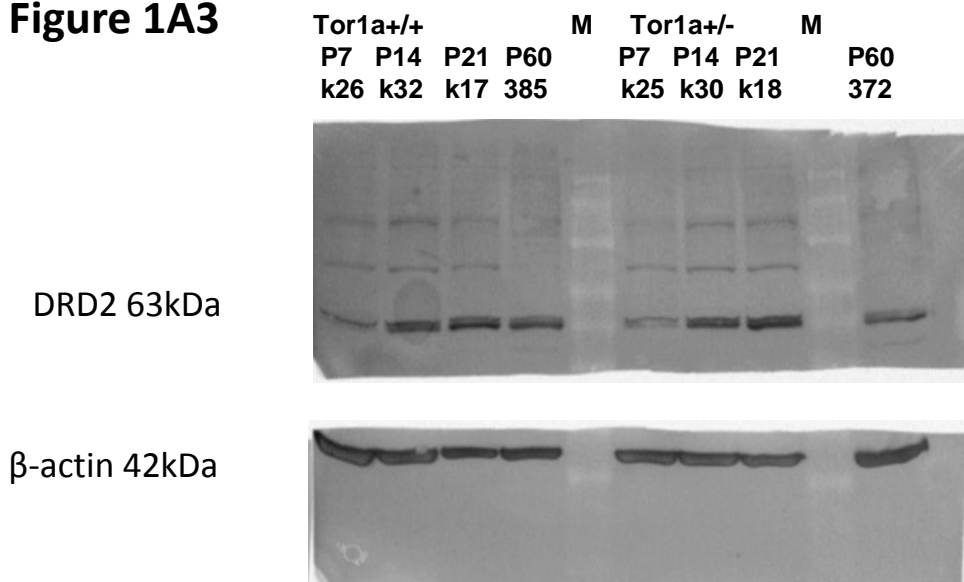

**Figure 1A4**

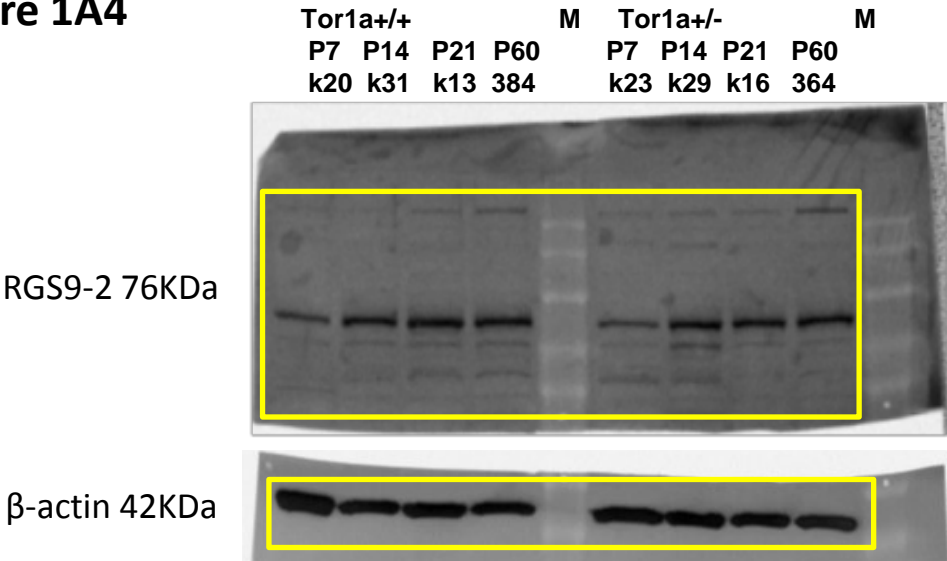

Figure 1B- DRD2,torsinA

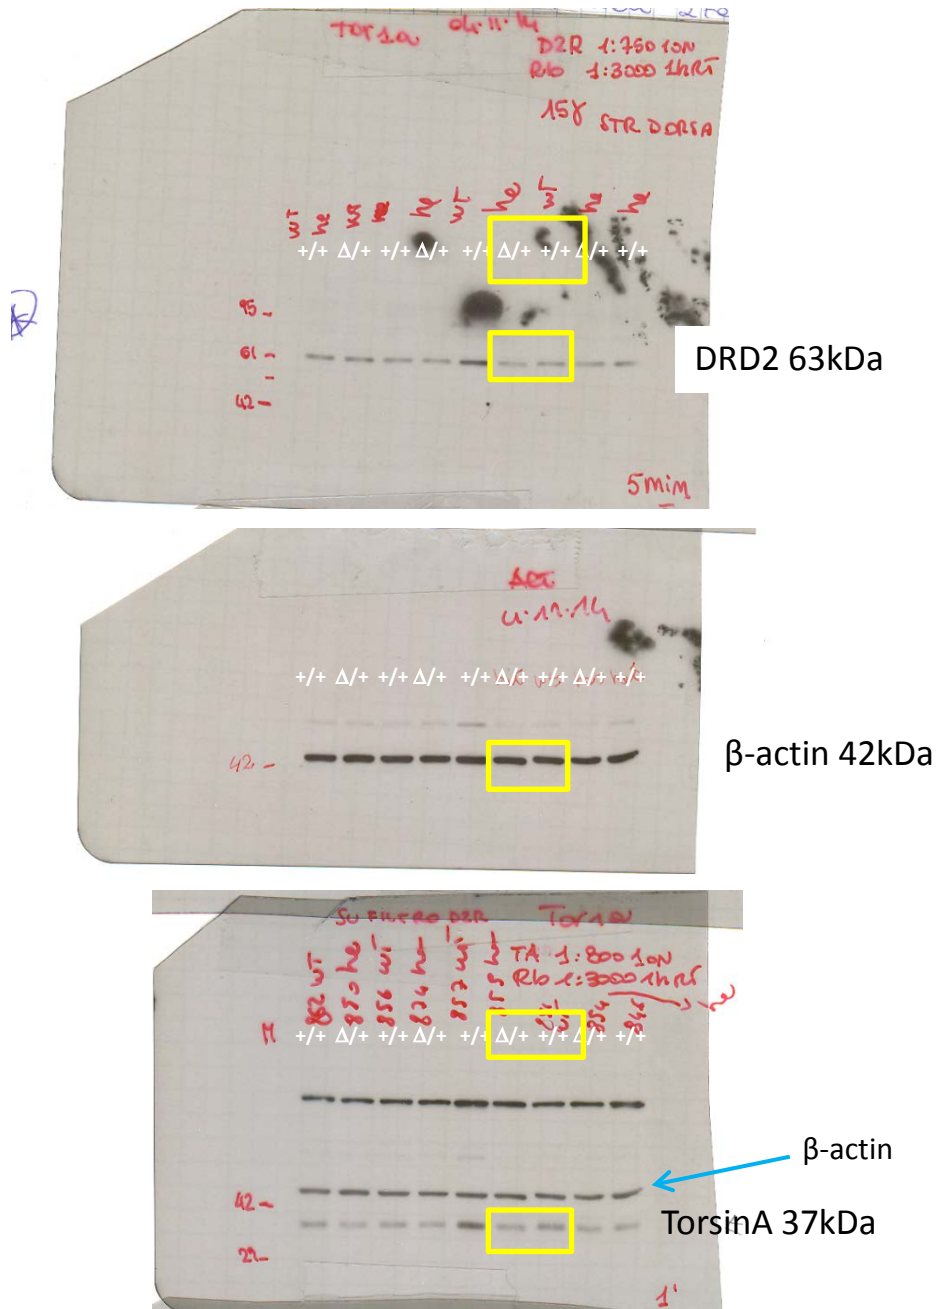

Figure 1B - RGS9-2

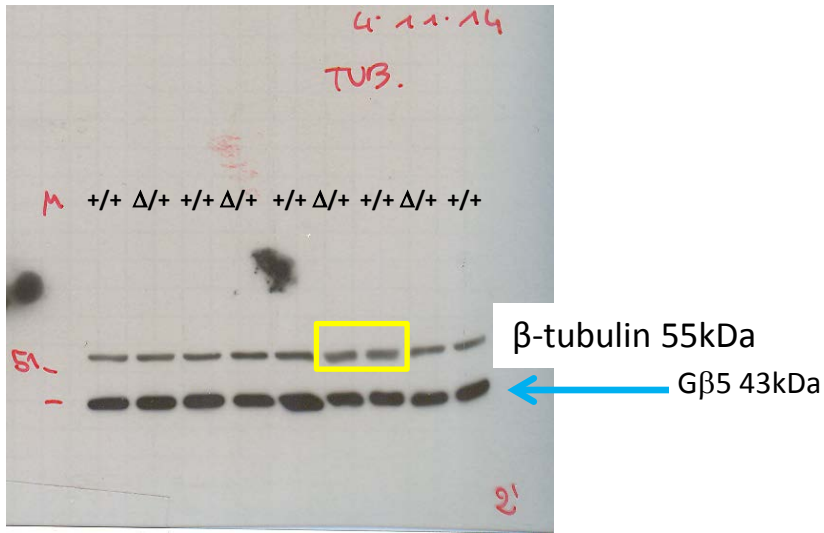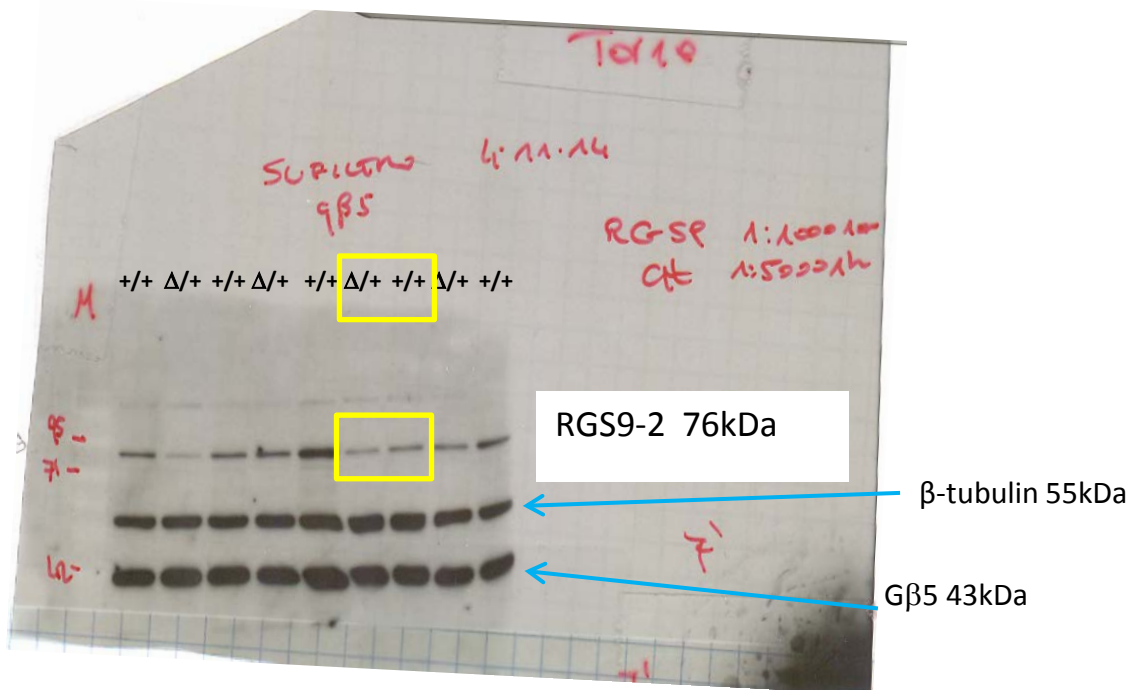

Supplement: EMMM-11-e9283-s003.pdf [file EMMM-11-e9283-s003.pdf]
