# Supplementary material for: RGS9‐2 rescues dopamine D2 receptor levels and signaling in DYT1 dystonia mouse models
Source: PubMed Central journal article supplement (PMC6328939; doi:10.15252/emmm.201809283), 2018-12-14

Figure 2A1- RGS9-2

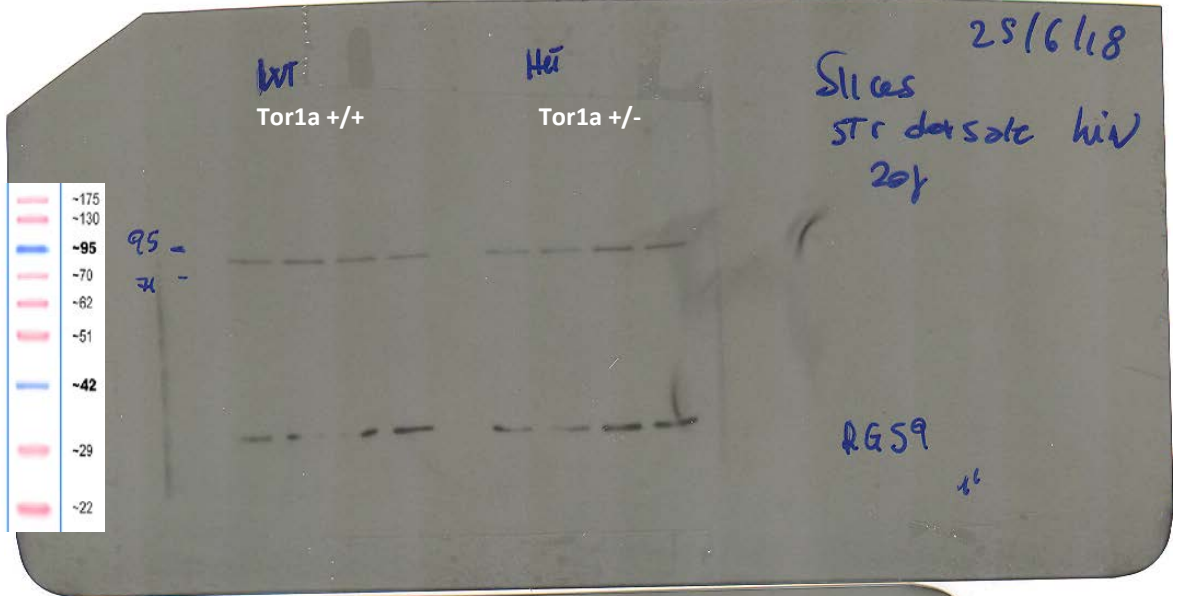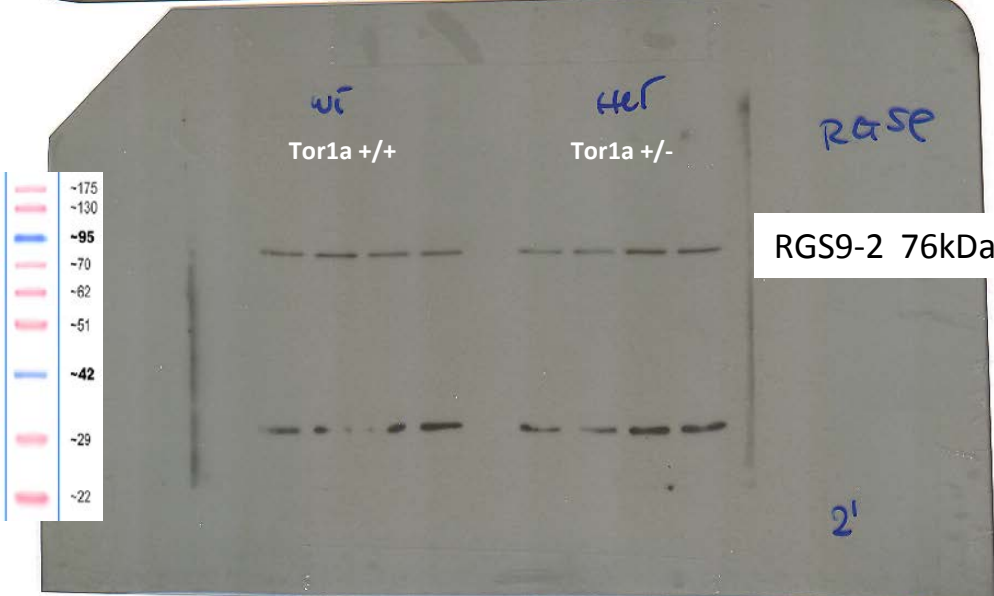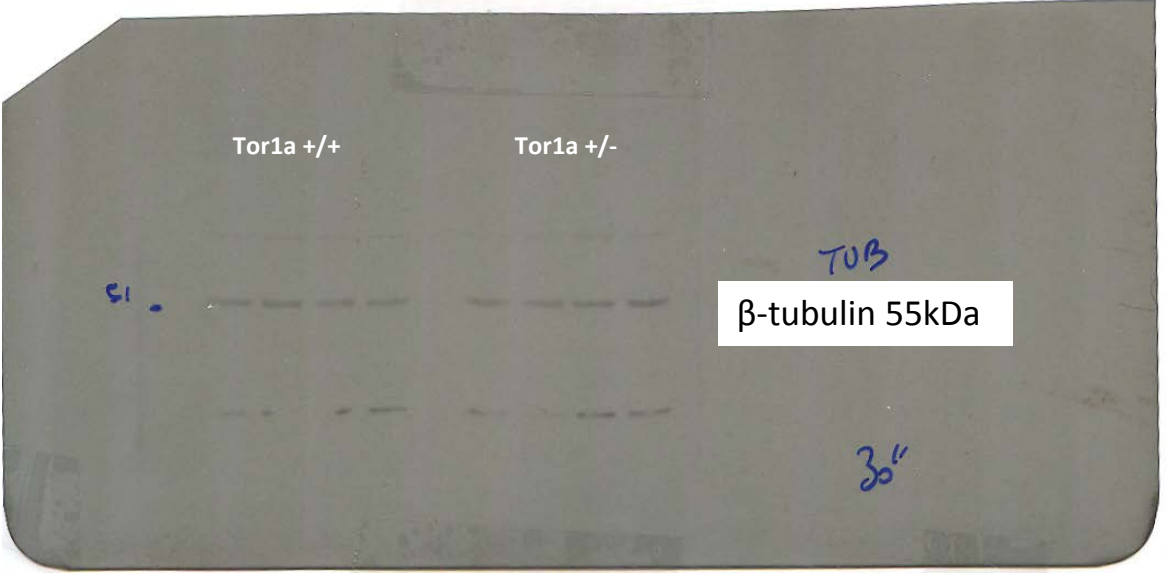

Figure 2A1- R7BP

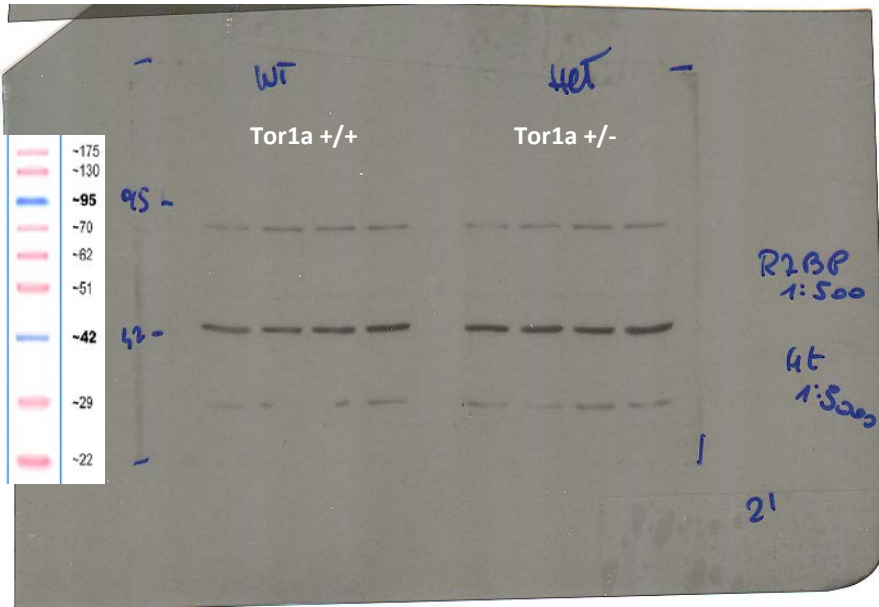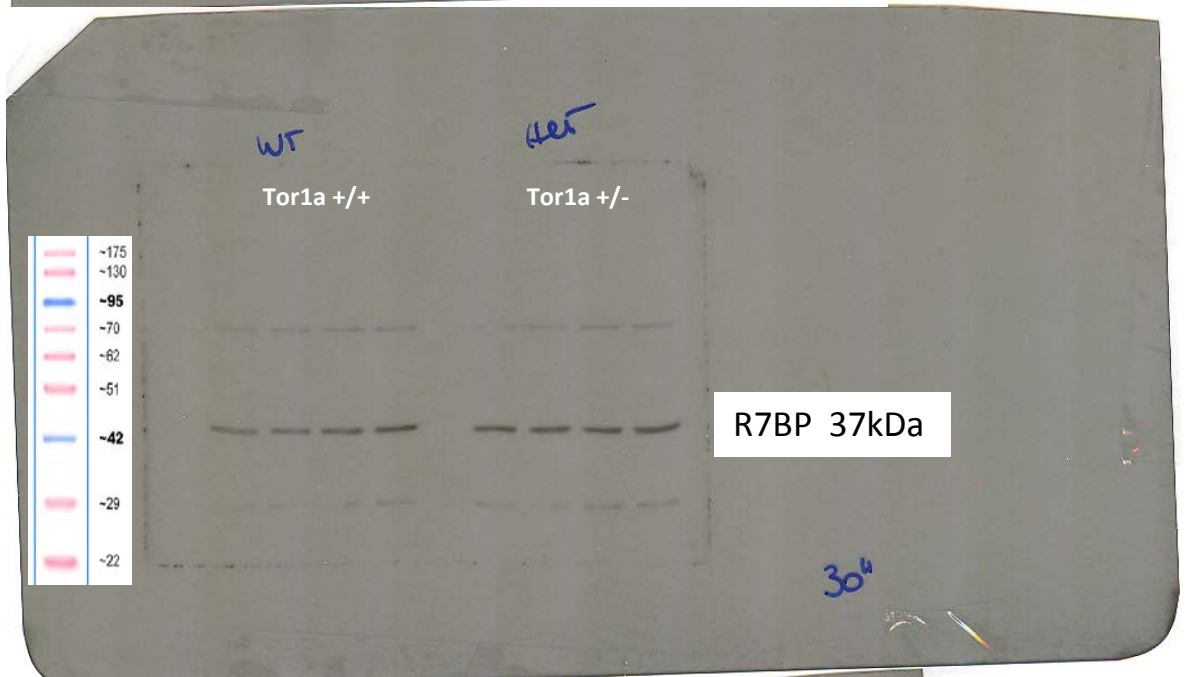

Figure 2A1- Gβ5

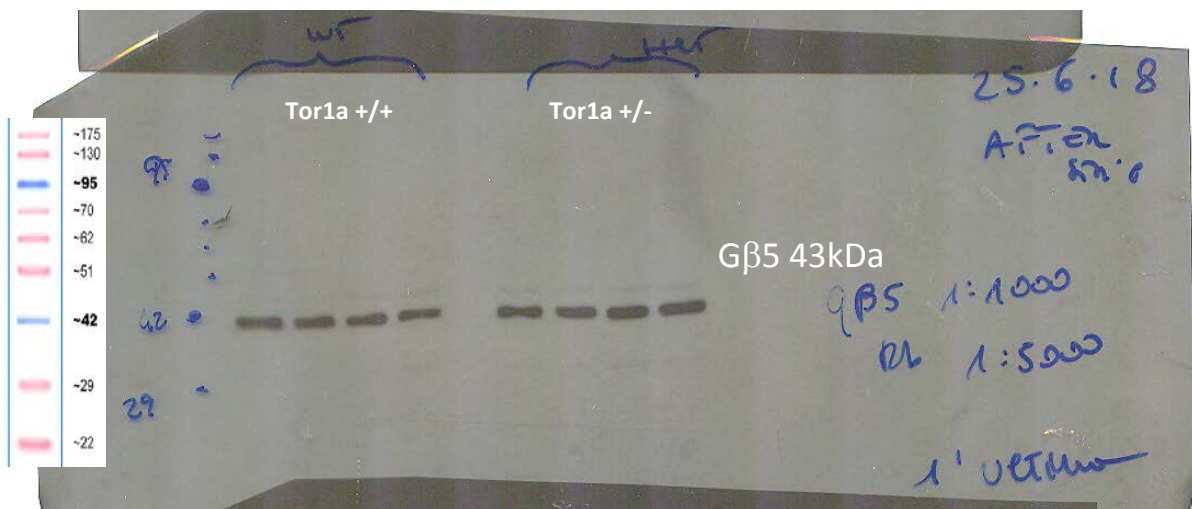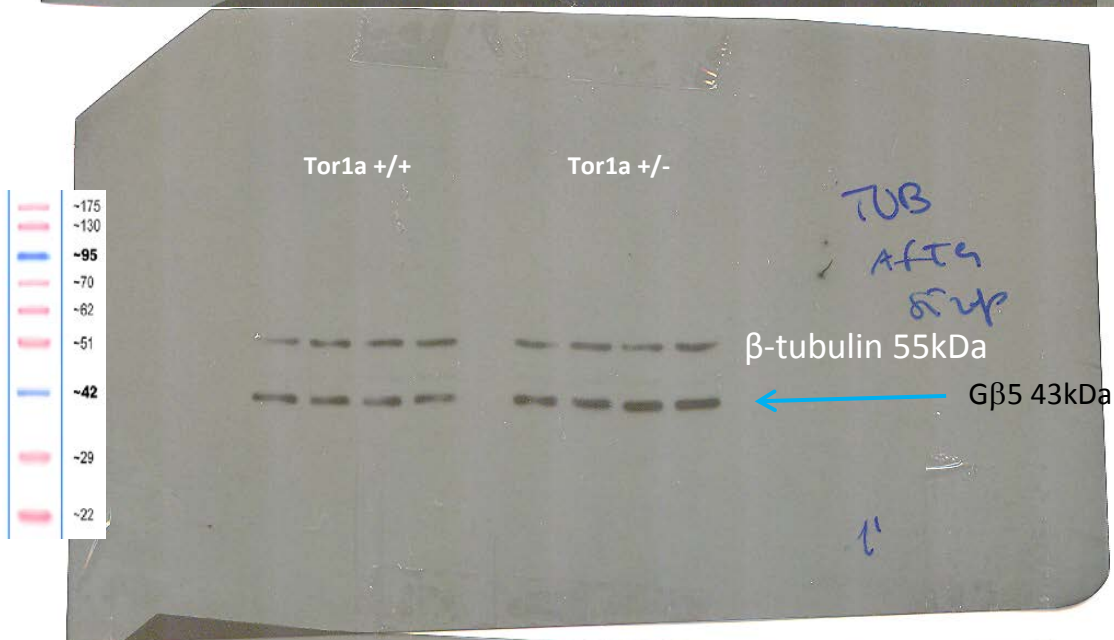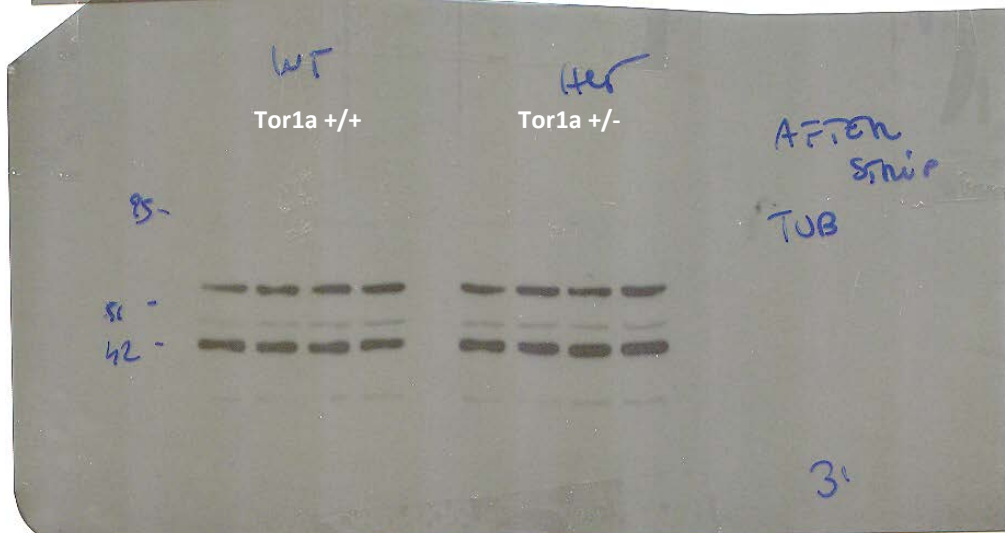

Figure 2B1

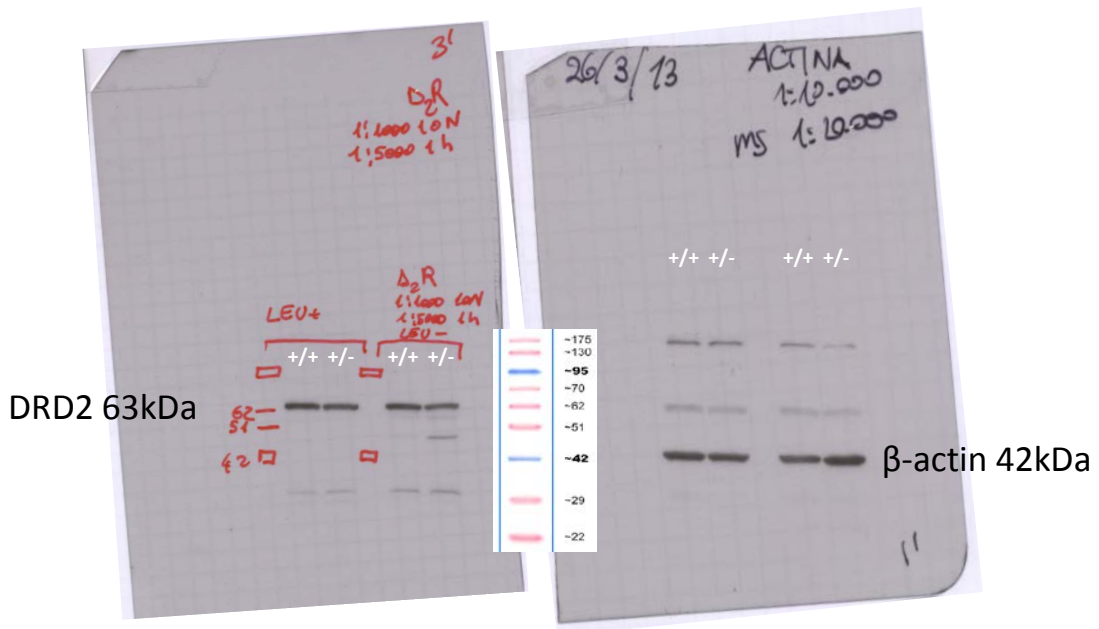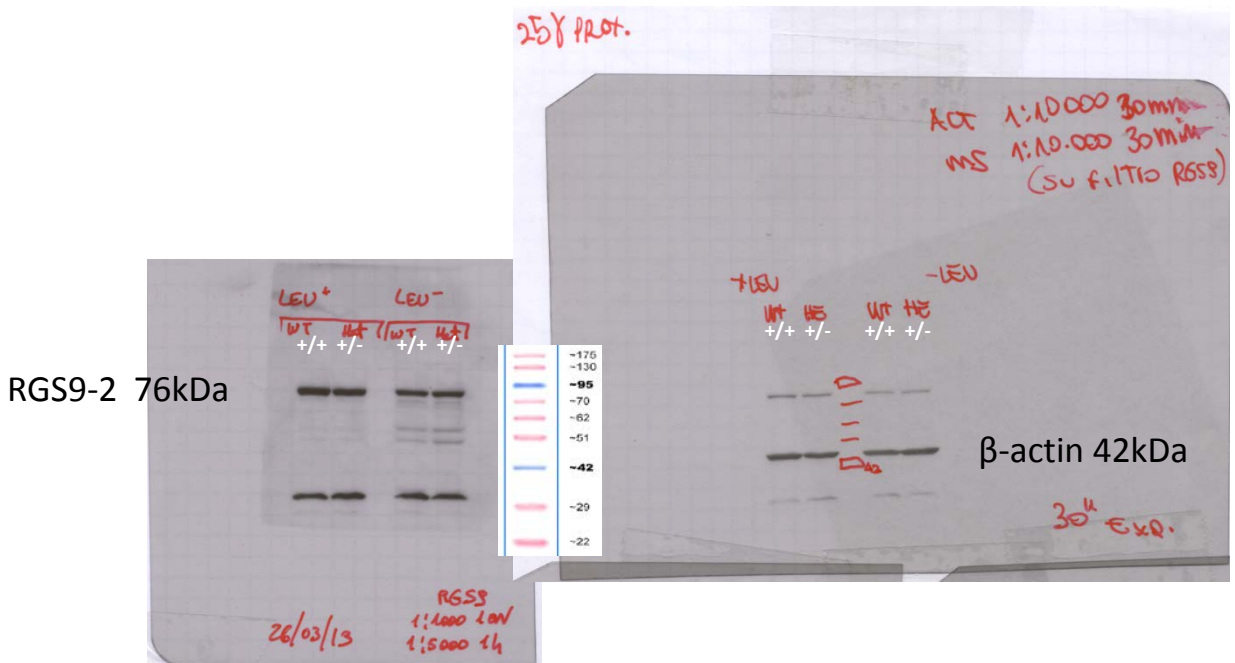

Supplement: EMMM-11-e9283-s004.pdf [file EMMM-11-e9283-s004.pdf]
