# Supplementary material for: RGS9‐2 rescues dopamine D2 receptor levels and signaling in DYT1 dystonia mouse models
Source: PubMed Central journal article supplement (PMC6328939; doi:10.15252/emmm.201809283), 2018-12-14

Figure 3A

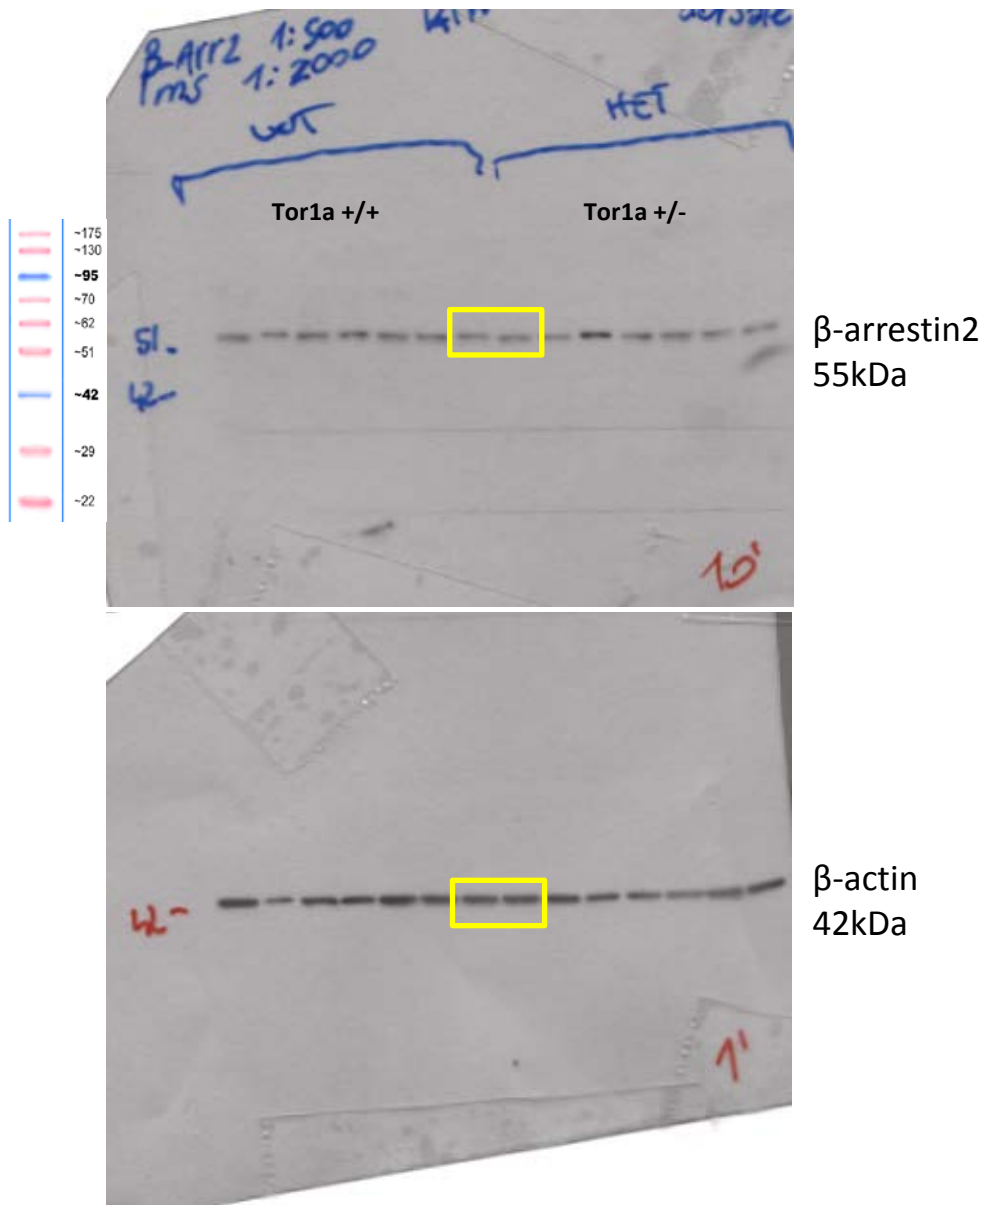

Figure 3B

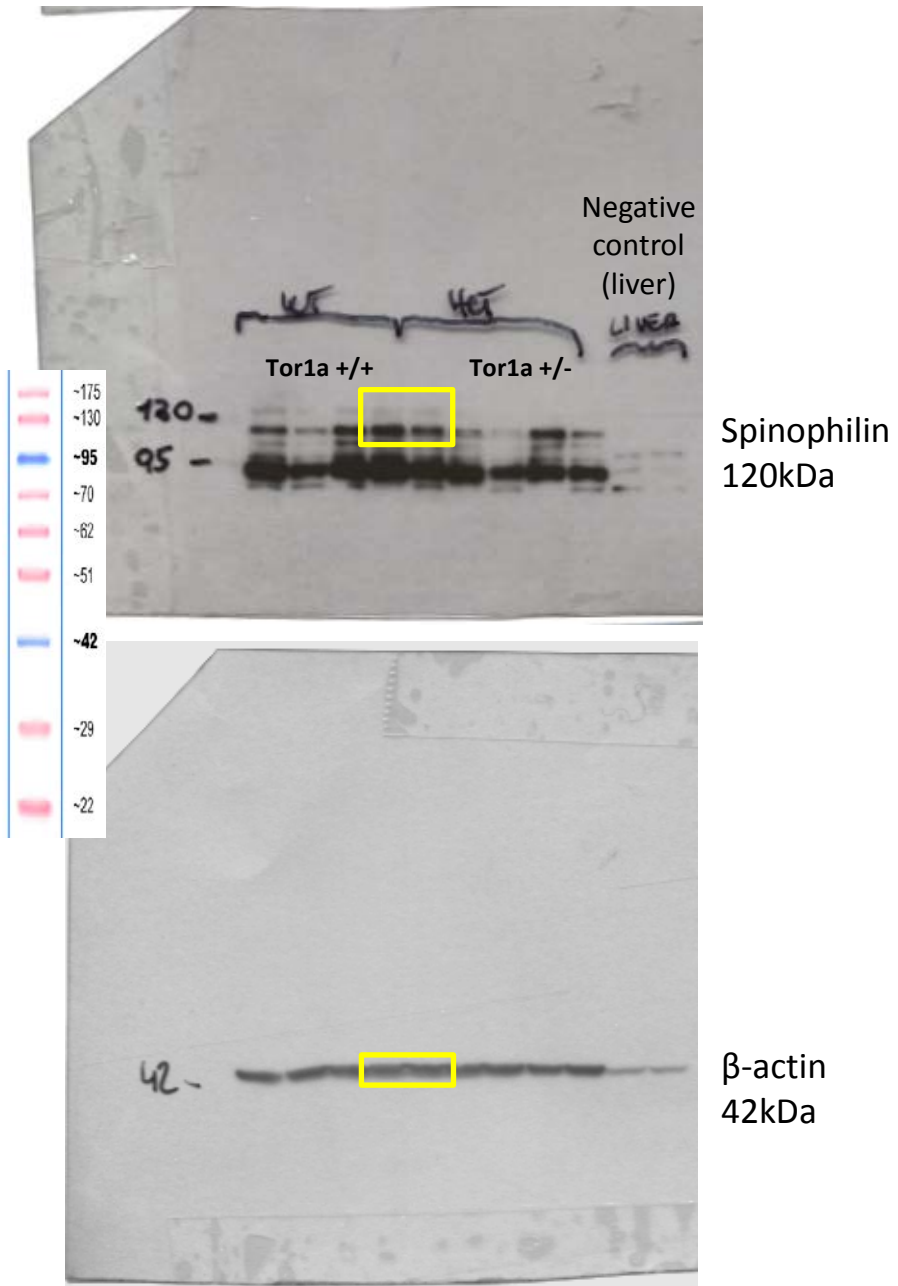

**Figure 3C**

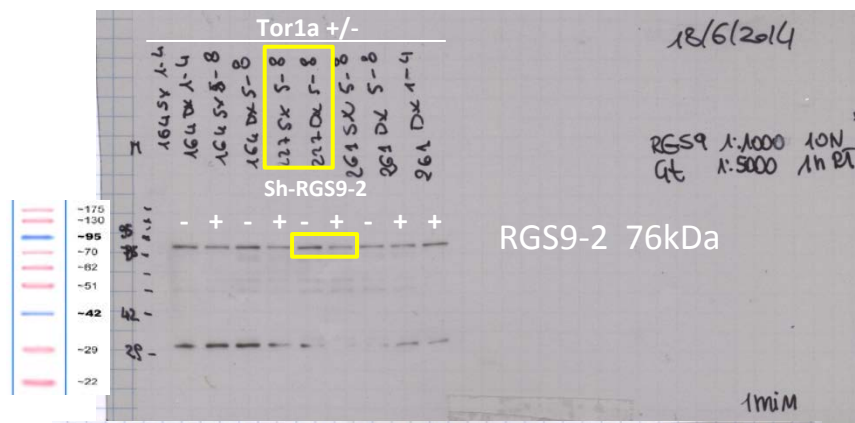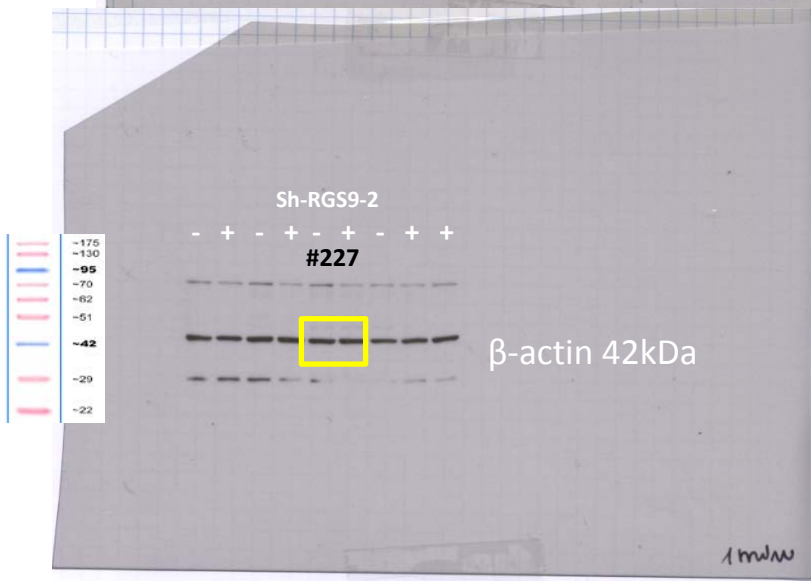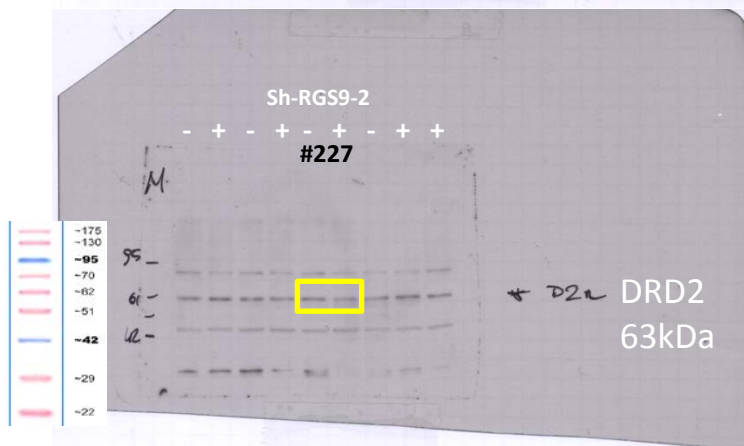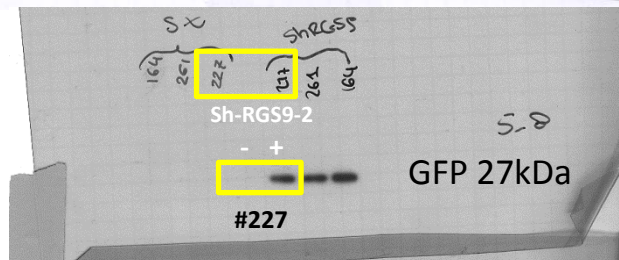

Figure 3D

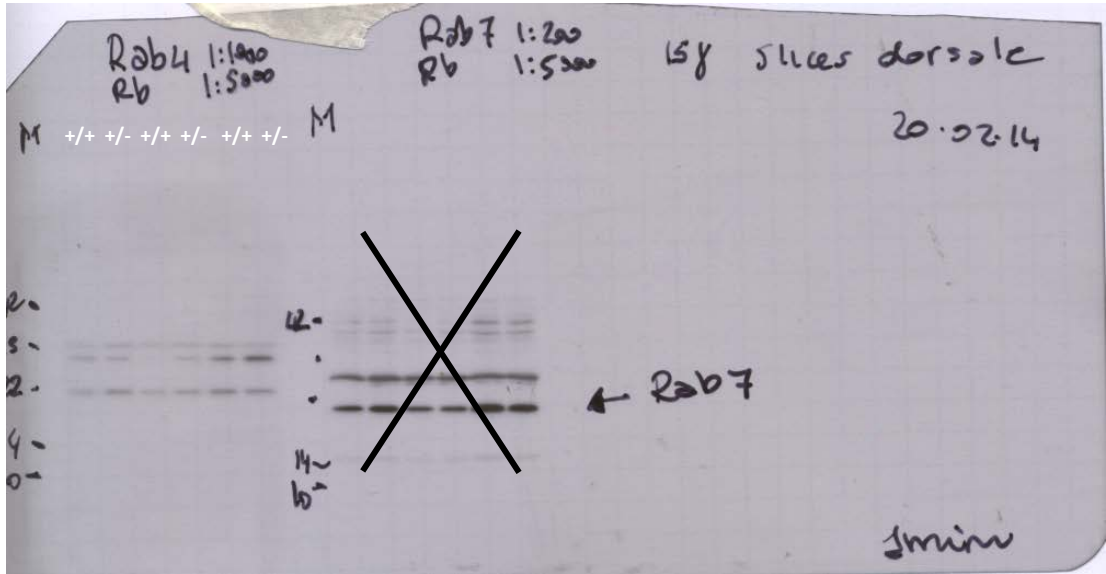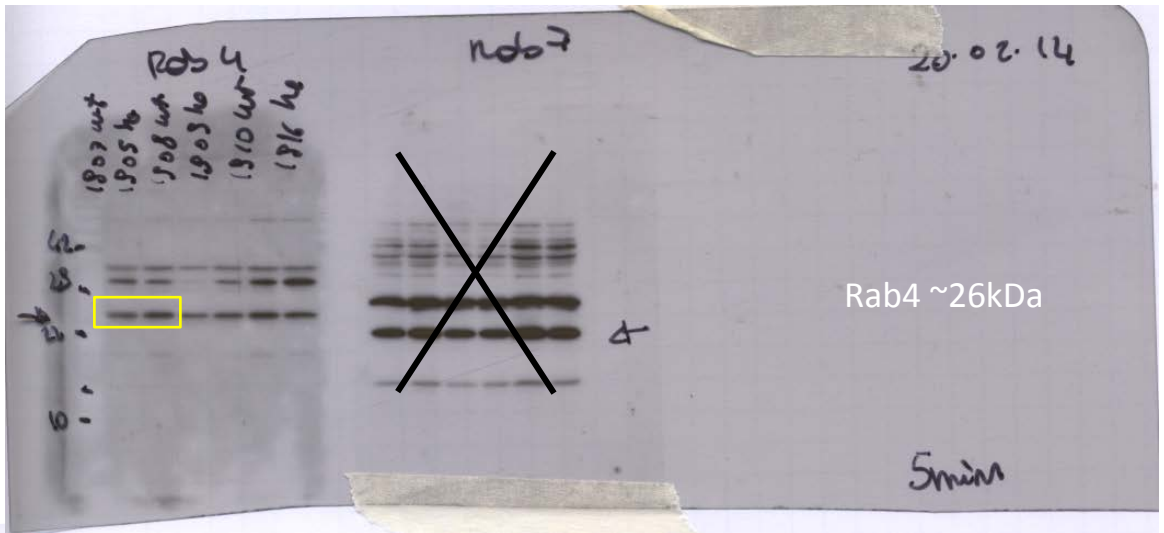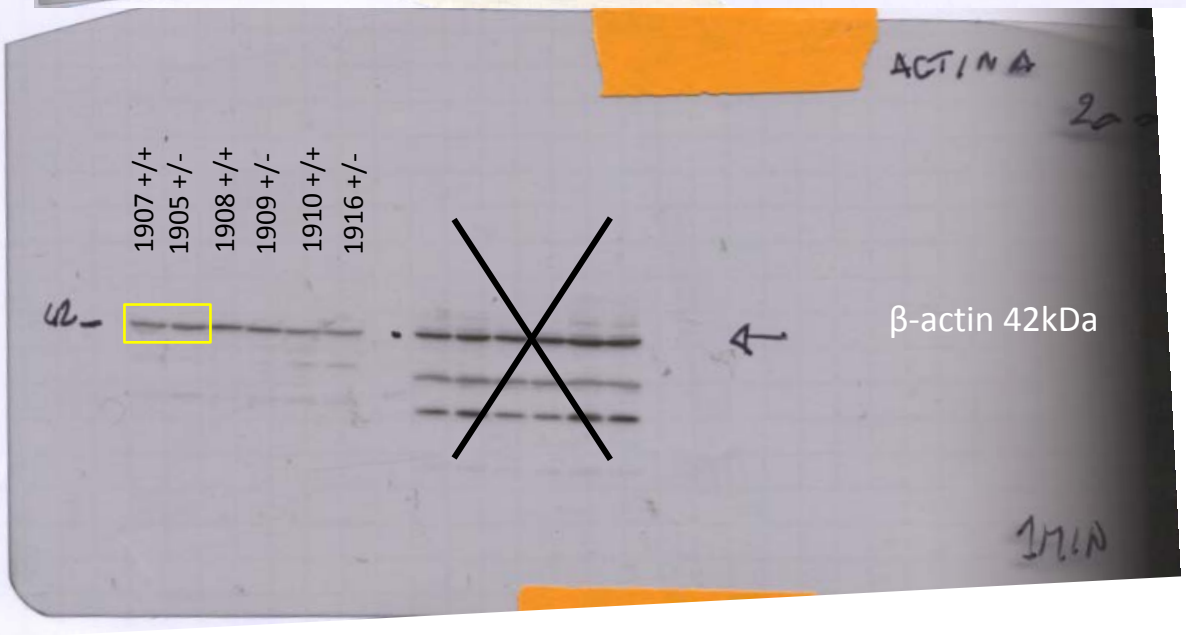

Figure 3G

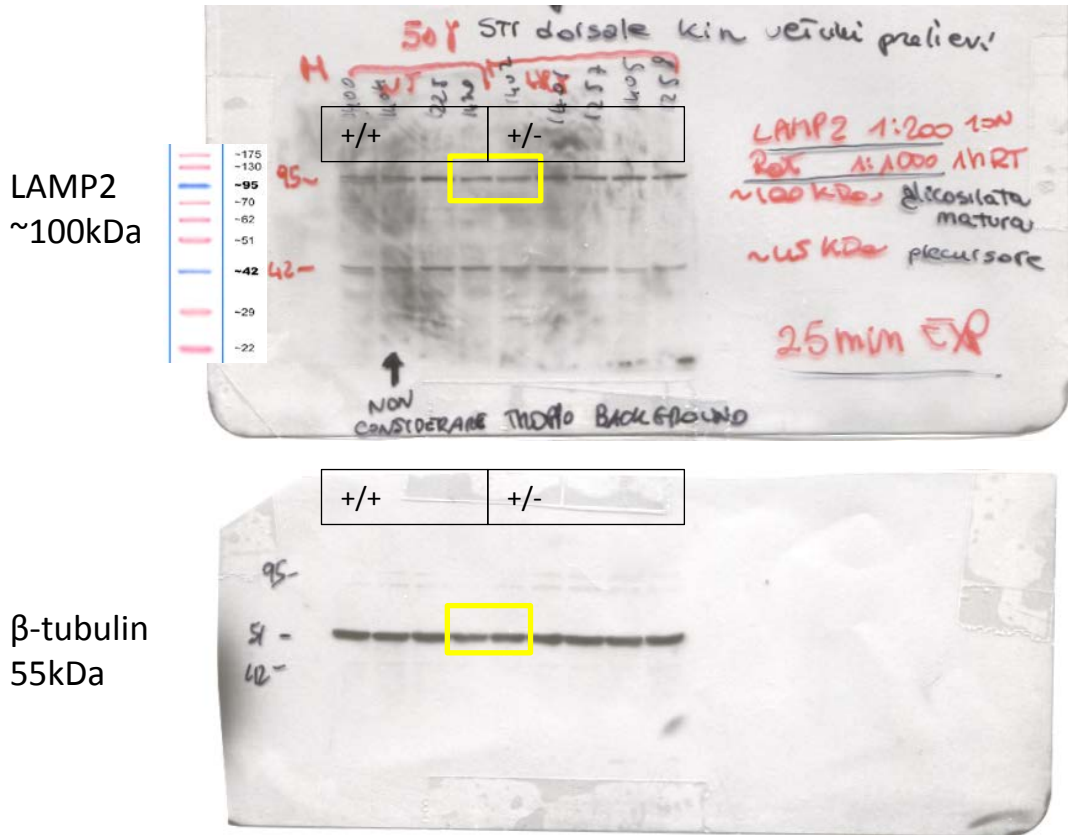

Supplement: EMMM-11-e9283-s005.pdf [file EMMM-11-e9283-s005.pdf]
